# Supplementary material for: Prompt closure versus gradual weaning of external ventricular drainage for hydrocephalus in adult patients with aneurysmal subarachnoid haemorrhage: a systematic review
Source: PubMed Central journal article supplement — BMJ Open. 2020 Nov 26;10(11):e040722. doi: 10.1136/bmjopen-2020-040722 (PMC7692827; doi:10.1136/bmjopen-2020-040722), 2020-11-26
Supplement: bmjopen-2020-040722supp001.pdf [file bmjopen-2020-040722supp001.pdf]

**Search strategies for  
'Prompt closure vs. gradual weaning of extraventricular drainage for hydrocephalus in adult patients with  
aneurysmal subarachnoid hemorrhage'**

(T Capion)

Preliminary searches performed 17 January 2020

|                                              |                     |
|----------------------------------------------|---------------------|
| <b>Total number identified</b>               | <b>1099 records</b> |
| <b>Number of duplicates removed</b>          | <b>367 records</b>  |
| <b>Number in list</b>                        | <b>732 records</b>  |
| <b>Number of new records sent to authors</b> | <b>84 records</b>   |

**Cochrane Central Register of Controlled Trials (CENTRAL) in The Cochrane Library (2020, Issue 1) (12 hits)**

- #1 MeSH descriptor: [Subarachnoid Hemorrhage] explode all trees
- #2 (subarachnoid\* or SAH)
- #3 #1 or #2
- #4 MeSH descriptor: [Drainage] explode all trees
- #5 MeSH descriptor: [Ventriculostomy] explode all trees
- #6 (drain\* or ventricul\* or evd)
- #7 #4 or #5 or #6
- #8 MeSH descriptor: [Device Removal] explode all trees
- #9 (cessation\* or clos\* or weaning)
- #10 #8 or #9
- #11 #3 and #7 and #10

**MEDLINE Ovid (1946 to January 2020) (313 hits)**

1. exp Subarachnoid Hemorrhage/
2. (subarachnoid\* or SAH).mp. [mp=title, abstract, original title, name of substance word, subject heading word, floating sub-heading word, keyword heading word, protocol supplementary concept word, rare disease supplementary concept word, unique identifier, synonyms]
3. 1 or 2
4. exp Drainage/
5. exp Ventriculostomy/
6. (drain\* or ventricul\* or evd).mp. [mp=title, abstract, original title, name of substance word, subject heading word, floating sub-heading word, keyword heading word, protocol supplementary concept word, rare disease supplementary concept word, unique identifier, synonyms]
7. 4 or 5 or 6
8. exp Device Removal/
9. (cessation\* or clos\* or weaning).mp. [mp=title, abstract, original title, name of substance word, subject heading word, floating sub-heading word, keyword heading word, protocol supplementary concept word, rare disease supplementary concept word, unique identifier, synonyms]
10. 8 or 9
11. 3 and 7 and 10

**Embase Ovid (1974 to January 2020) (353 hits)**

1. exp subarachnoid hemorrhage/
2. (subarachnoid\* or SAH).mp. [mp=title, abstract, heading word, drug trade name, original title, device manufacturer, drug manufacturer, device trade name, keyword, floating subheading word, candidate term word]
3. 1 or 2
4. exp drain/
5. exp ventriculostomy/
6. (drain\* or ventricul\* or evd).mp. [mp=title, abstract, heading word, drug trade name, original title, device manufacturer, drug manufacturer, device trade name, keyword, floating subheading word, candidate term word]
7. 4 or 5 or 6
8. exp device removal/
9. (cessation\* or clos\* or weaning).mp. [mp=title, abstract, heading word, drug trade name, original title, device manufacturer, drug manufacturer, device trade name, keyword, floating subheading word, candidate term word]
10. 8 or 9
11. 3 and 7 and 10

**LILACS (Bireme; 1982 to January 2020) (4 hits)**

(subarachnoid\$ or SAH) [Words] and (drain\$ or ventricul\$ or evd) [Words] and (cessation\$ or clos\$ or weaning) [Words]

**Science Citation Index Expanded (1900 to January 2020) and Conference Proceedings Citation Index – Science (1990 to January 2020) (Web of Science) (235 hits)**

#4 #3 AND #2 AND #1

#3 TS=(cessation\* or clos\* or weaning)

#2 TS=(drain\* or ventricul\* or evd)

#1 TS=(subarachnoid\* or SAH)

**Search strategies for  
'Prompt closure vs. gradual weaning of extraventricular drainage for hydrocephalus in adult patients with  
aneurysmal subarachnoid hemorrhage'**

(T Capion)

Preliminary searches performed 28 November 2018

|                                     |                        |
|-------------------------------------|------------------------|
| <b>Total number identified</b>      | <b>1033 references</b> |
| <b>Number of duplicates removed</b> | <b>366 references</b>  |
| <b>Number in list</b>               | <b>667 references</b>  |

**Cochrane Central Register of Controlled Trials (CENTRAL) in The Cochrane Library (2018, Issue 11) (6 hits)**

- #1 MeSH descriptor: [Subarachnoid Hemorrhage] explode all trees
- #2 (subarachnoid\* or SAH)
- #3 #1 or #2
- #4 MeSH descriptor: [Drainage] explode all trees
- #5 MeSH descriptor: [Ventriculostomy] explode all trees
- #6 (drain\* or ventricul\* or evd)
- #7 #4 or #5 or #6
- #8 MeSH descriptor: [Device Removal] explode all trees
- #9 (cessation\* or clos\* or weaning)
- #10 #8 or #9
- #11 #3 and #7 and #10

**MEDLINE Ovid (1946 to November 2018) (299 hits)**

1. exp Subarachnoid Hemorrhage/
2. (subarachnoid\* or SAH).mp. [mp=title, abstract, original title, name of substance word, subject heading word, floating sub-heading word, keyword heading word, protocol supplementary concept word, rare disease supplementary concept word, unique identifier, synonyms]
3. 1 or 2
4. exp Drainage/
5. exp Ventriculostomy/
6. (drain\* or ventricul\* or evd).mp. [mp=title, abstract, original title, name of substance word, subject heading word, floating sub-heading word, keyword heading word, protocol supplementary concept word, rare disease supplementary concept word, unique identifier, synonyms]
7. 4 or 5 or 6
8. exp Device Removal/
9. (cessation\* or clos\* or weaning).mp. [mp=title, abstract, original title, name of substance word, subject heading word, floating sub-heading word, keyword heading word, protocol supplementary concept word, rare disease supplementary concept word, unique identifier, synonyms]
10. 8 or 9
11. 3 and 7 and 10

**Embase Ovid (1974 to November 2018) (496 hits)**

1. exp subarachnoid hemorrhage/
2. (subarachnoid\* or SAH).mp. [mp=title, abstract, heading word, drug trade name, original title, device manufacturer, drug manufacturer, device trade name, keyword, floating subheading word, candidate term word]
3. 1 or 2
4. exp drain/
5. exp ventriculostomy/
6. (drain\* or ventricul\* or evd).mp. [mp=title, abstract, heading word, drug trade name, original title, device manufacturer, drug manufacturer, device trade name, keyword, floating subheading word, candidate term word]
7. 4 or 5 or 6
8. exp device removal/
9. (cessation\* or clos\* or weaning).mp. [mp=title, abstract, heading word, drug trade name, original title, device manufacturer, drug manufacturer, device trade name, keyword, floating subheading word, candidate term word]
10. 8 or 9
11. 3 and 7 and 10

**LILACS (Bireme; 1982 to November 2018) (3 hits)**

(subarachnoid\$ or SAH) [Words] and (drain\$ or ventricul\$ or evd) [Words] and (cessation\$ or clos\$ or weaning) [Words]

**Science Citation Index Expanded (1900 to November 2018) and Conference Proceedings Citation Index – Science (1990 to November 2018) (Web of Science) (229 hits)**

#4 #3 AND #2 AND #1

#3 TS=(cessation\* or clos\* or weaning)

#2 TS=(drain\* or ventricul\* or evd)

#1 TS=(subarachnoid\* or SAH)
