# Supplementary material for: Prompt closure versus gradual weaning of external ventricular drainage for hydrocephalus in adult patients with aneurysmal subarachnoid haemorrhage: a systematic review
Source: PubMed Central journal article supplement — BMJ Open. 2020 Nov 26;10(11):e040722. doi: 10.1136/bmjopen-2020-040722 (PMC7692827; doi:10.1136/bmjopen-2020-040722), 2020-11-26
Supplement: bmjopen-2020-040722supp002.pdf [file bmjopen-2020-040722supp002.pdf]

## Appendix 2: Observational studies

---

| Study                                                                                                                                                                        | Objective                                                                                                 | Method                     | Outcomes                                                    | Serious Adverse Events                                                       |
|------------------------------------------------------------------------------------------------------------------------------------------------------------------------------|-----------------------------------------------------------------------------------------------------------|----------------------------|-------------------------------------------------------------|------------------------------------------------------------------------------|
| Jabbarli R. et al.:<br><i>Gradual External Ventricular Drainage Weaning Reduces The Risk of Shunt Dependency After Aneurysmal Subarachnoid Hemorrhage: A Pooled Analysis</i> | To evaluate the role of external ventricular drainage (EVD) weaning on risk of shunt dependency after SAH | Observational cohort study | Development and timing of shunt dependency in SAH survivals | Shunt dependency: RW: 34.73%, GW: 27.45% (OR 0,71, CI: 0.54-0.94, P = 0,018) |
