# Supplementary material for: Prompt closure versus gradual weaning of external ventricular drainage for hydrocephalus in adult patients with aneurysmal subarachnoid haemorrhage: a systematic review
Source: PubMed Central journal article supplement — BMJ Open. 2020 Nov 26;10(11):e040722. doi: 10.1136/bmjopen-2020-040722 (PMC7692827; doi:10.1136/bmjopen-2020-040722), 2020-11-26
Supplement: bmjopen-2020-040722supp003.pdf [file bmjopen-2020-040722supp003.pdf]

### Appendix 3: Excluded studies

|                     | Study # 1                                                                                                                                      | Study # 2                                                                                                                                             | Study # 3                                                                                                                                                             | Study # 4                                                                                                                                                                      | Study # 5                                                                                                                                                                                                  |
|---------------------|------------------------------------------------------------------------------------------------------------------------------------------------|-------------------------------------------------------------------------------------------------------------------------------------------------------|-----------------------------------------------------------------------------------------------------------------------------------------------------------------------|--------------------------------------------------------------------------------------------------------------------------------------------------------------------------------|------------------------------------------------------------------------------------------------------------------------------------------------------------------------------------------------------------|
| Title               | <i>Csf diversion in aneurysmal subarachnoid hemorrhage: How low should we go?</i>                                                              | <i>Gradual External Ventricular Drainage Weaning Reduces The Risk of Shunt Dependency After Aneurysmal Subarachnoid Hemorrhage: a Pooled Analysis</i> | <i>A comment to: "Gradual External Ventricular Drainage Weaning Reduces The Risk of Shunt Dependency After Aneurysmal Subarachnoid Hemorrhage: a Pooled Analysis"</i> | <i>Continuous cerebral spinal fluid drainage associated with complications in patients admitted with subarachnoid hemorrhage</i>                                               | <i>An early EVD clamp trial approach for subarachnoid hemorrhage is associated with a lower ventriculoperitoneal shunt rate, shorter length of stay, and fewer EVD complications-a retrospective study</i> |
| Authors             | Fugate J; Rabenstein A; Wijdicks E; Freeman W; Lanzino G.                                                                                      | Jabbarli R; Pierscianek D; Rolz R; Reinhard M; Darkwah Oppong M; Scheiwe C; Dammann P; Kaier K; Wrede KH; Shah M; Zentner J; Sure U.                  | Lilja-Cyron A; Mathiesen T.                                                                                                                                           | Olson DM; Zomorodi M; Britz GW; Zomorodi AR; Amato A; Graffagnino C.                                                                                                           | Rao S; Wolcott ZC; Chung DY; Sheriff F; Khawaja A; Patel AB; Kimberly WT; Rordorf GA.                                                                                                                      |
| Year of publication | 2014                                                                                                                                           | 2018                                                                                                                                                  | 2018                                                                                                                                                                  | 2013                                                                                                                                                                           | 2017                                                                                                                                                                                                       |
| Journal             | Neurology CONFERENCE START: 2014 Apr 26 CONFERENCE END: 2014 May 3 2014;82(10 SUPPL. 1): Lippincott Williams and Wilkins MISC1 - 20140527 2014 | Operative Neurosurgery (hagerstown, md 2018;15(5):498-504 United States.nlm (Medline)                                                                 | Operative neurosurgery 2018;(5):504-504 2018                                                                                                                          | Journal of neurosurgery ;119(4):974-980 United States American Association of Neurological Surgeons (1224 West Main Street Suite 450, Charlottesville VA 22903, United States) | Neurocritical care 2017; Conference: 15th Annual Meeting of the Neurocritical Care Society, NCS 2017. United States. 27(2 Supplement 1):S3 Netherlands Humana Press Inc. 2017                              |
| Objective           | To evaluate the feasibility of                                                                                                                 | To evaluate the role of external ventricular                                                                                                          | Comment to existing article                                                                                                                                           | To explore whether continuous or                                                                                                                                               | To determine the optimal approach of                                                                                                                                                                       |

|                         |                                                                                                                                          |                                                                        |                    |                                                                                                                                                                                    |                                                                                  |
|-------------------------|------------------------------------------------------------------------------------------------------------------------------------------|------------------------------------------------------------------------|--------------------|------------------------------------------------------------------------------------------------------------------------------------------------------------------------------------|----------------------------------------------------------------------------------|
|                         | randomizing patients with aneurysmal subarachnoid haemorrhage and hydrocephalus to "aggressive" vs "conventional" cerebrospinal drainage | drainage (EVD) weaning on risk of shunt dependency after SAH           |                    | intermittent CSF drainage was superior for reducing vasospasm                                                                                                                      | gradual wean vs. early clamp trial in nontraumatic SAH requiring EVD             |
| Study design            | 2-center, prospective, randomized pilot study                                                                                            | Observational cohort study                                             |                    | Randomized clinical trial                                                                                                                                                          | Retrospective study                                                              |
| Intervention            | Aggressive CSF drainage with EVD open to 5 mmHg vs. conventional CSF drainage with EVD open to 15 mmHg                                   | Rapid weaning vs. gradual weaning of EVD treatment in SAH survivors    |                    | Continuous CSF drainage with intermittent intracranial pressure (ICP) monitoring (open-EVD group) vs. continuous ICP monitoring with intermittent CSF drainage (monitor-ICP group) | Gradual wean vs. early clamp trial in nontraumatic SAH requiring EVD             |
| Patients                | 20 (13 in the aggressive group)                                                                                                          | 965 (455 in the rapid wean group and 510 in the gradual weaning group) |                    | 60 patients (division between groups unknown)                                                                                                                                      | 200                                                                              |
| Outcomes                |                                                                                                                                          | Development and timing of shunt dependency                             |                    | Incidence of cerebral artery vasospasm                                                                                                                                             | VP shunt rate<br>NICU and hospital LOS<br>EVD duration<br>EVD related infections |
| Reason(s) for exclusion | Wrong intervention<br>Full-text not available                                                                                            | Wrong study design                                                     | Wrong study design | Wrong intervention                                                                                                                                                                 | Wrong study design<br>Full-text not available                                    |
